# Supplementary material for: Expression and Functional Analysis of the Compact Thermophilic Anoxybacillus flavithermus Cas9 Nuclease
Source: MDPI journal article supplement (doi:10.3390/ijms242317121), 2023-12-04
Supplement: s1 [file s1]

**Table S1.** Amplification primers used for the generation of FAM-labeled dsDNA PAM-templates.

| Name            | Structure (5'-3')                                           |
|-----------------|-------------------------------------------------------------|
| Uni-Spacer-F    | caagaaggagatgtctggggatgtcagggatgcatttgggccat                |
| FAM-Uni-R       | tttcatctgtccagcaccttcatggattttaaagtgttcggcaaagaagaga        |
| Spacer-PAM-R_1  | tttcggcaaagaagagaggcttgttcttgacacttgaacaatggccacaaatgcatc   |
| Spacer-PAM-R_2  | tttcggcaaagaagagaggcttgttcttgacacttgaacaatggccacaaatgcatc   |
| Spacer-PAM-R_3  | tttcggcaaagaagagaggcttgttcttgacacttgaacaatggccacaaatgcatc   |
| Spacer-PAM-R_4  | tttcggcaaagaagagaggcttgttcttgacacttagaacaatggccacaaatgcatc  |
| Spacer-PAM-R_5  | tttcggcaaagaagagaggcttgttcttgacactttagaacaatggccacaaatgcatc |
| Spacer-PAM-R_6  | tttcggcaaagaagagaggcttgttcttgacacttggatcaatggccacaaatgcatc  |
| Spacer-PAM-R_7  | tttcggcaaagaagagaggcttgttcttgacacttcatcaatggccacaaatgcatc   |
| Spacer-PAM-R_8  | tttcggcaaagaagagaggcttgttcttgacacttagatcaatggccacaaatgcatc  |
| Spacer-PAM-R_9  | tttcggcaaagaagagaggcttgttcttgacactttagcaatggccacaaatgcatc   |
| Spacer-PAM-R_10 | tttcggcaaagaagagaggcttgttcttgacacttggagcaatggccacaaatgcatc  |
| Spacer-PAM-R_11 | tttcggcaaagaagagaggcttgttcttgacacttggagcaatggccacaaatgcatc  |
| Spacer-PAM-R_12 | tttcggcaaagaagagaggcttgttcttgacacttagagcaatggccacaaatgcatc  |
| Spacer-PAM-R_13 | tttcggcaaagaagagaggcttgttcttgacactttagcaatggccacaaatgcatc   |
| Spacer-PAM-R_14 | tttcggcaaagaagagaggcttgttcttgacactttagcaatggccacaaatgcatc   |
| Spacer-PAM-R_15 | tttcggcaaagaagagaggcttgttcttgacactttagcaatggccacaaatgcatc   |
| Spacer-PAM-R_16 | tttcggcaaagaagagaggcttgttcttgacacttagaccaatggccacaaatgcatc  |
| Spacer-PAM-R_18 | tttcggcaaagaagagaggcttgttcttgacacgtcgaccaatggccacaaatgcatc  |
| Spacer-PAM-R_19 | tttcggcaaagaagagaggcttgttcttgacacctcgaccaatggccacaaatgcatc  |
| Spacer-PAM-R_20 | tttcggcaaagaagagaggcttgttcttgacacatcgaccaatggccacaaatgcatc  |
| Spacer-PAM-R_21 | tttcggcaaagaagagaggcttgttcttgacacttcgacctatggccacaaatgcatc  |
| Spacer-PAM-R_22 | tttcggcaaagaagagaggcttgttcttgacacgtcgacctatggccacaaatgcatc  |
| Spacer-PAM-R_23 | tttcggcaaagaagagaggcttgttcttgacacctcgacctatggccacaaatgcatc  |
| Spacer-PAM-R_24 | tttcggcaaagaagagaggcttgttcttgacacatcgacctatggccacaaatgcatc  |
| Spacer-PAM-R_25 | tttcggcaaagaagagaggcttgttcttgacacttcgaccgatggccacaaatgcatc  |
| Spacer-PAM-R_26 | tttcggcaaagaagagaggcttgttcttgacacgtcgaccgatggccacaaatgcatc  |
| Spacer-PAM-R_27 | tttcggcaaagaagagaggcttgttcttgacacctcgaccgatggccacaaatgcatc  |
| Spacer-PAM-R_28 | tttcggcaaagaagagaggcttgttcttgacacatcgaccgatggccacaaatgcatc  |
| Spacer-PAM-R_29 | tttcggcaaagaagagaggcttgttcttgacacttcgacctatggccacaaatgcatc  |
| Spacer-PAM-R_30 | tttcggcaaagaagagaggcttgttcttgacacgtcgacctatggccacaaatgcatc  |
| Spacer-PAM-R_31 | tttcggcaaagaagagaggcttgttcttgacacctcgacctatggccacaaatgcatc  |
| Spacer-PAM-R_32 | tttcggcaaagaagagaggcttgttcttgacacatcgacctatggccacaaatgcatc  |
| Spacer-PAM-R_33 | tttcggcaaagaagagaggcttgttcttgacacttcgtcttatggccacaaatgcatc  |
| Spacer-PAM-R_34 | tttcggcaaagaagagaggcttgttcttgacacttcgtcttatggccacaaatgcatc  |
| Spacer-PAM-R_35 | tttcggcaaagaagagaggcttgttcttgacacttcgtcttatggccacaaatgcatc  |
| Spacer-PAM-R_36 | tttcggcaaagaagagaggcttgttcttgacacttcgtcttatggccacaaatgcatc  |
| Spacer-PAM-R_37 | tttcggcaaagaagagaggcttgttcttgacacttcggcttatggccacaaatgcatc  |
| Spacer-PAM-R_38 | tttcggcaaagaagagaggcttgttcttgacacttcggcttatggccacaaatgcatc  |
| Spacer-PAM-R_39 | tttcggcaaagaagagaggcttgttcttgacacttcggcttatggccacaaatgcatc  |
| Spacer-PAM-R_40 | tttcggcaaagaagagaggcttgttcttgacacttcggcttatggccacaaatgcatc  |
| Spacer-PAM-R_41 | tttcggcaaagaagagaggcttgttcttgacacttcgcttatggccacaaatgcatc   |
| Spacer-PAM-R_42 | tttcggcaaagaagagaggcttgttcttgacacttcgcttatggccacaaatgcatc   |
| Spacer-PAM-R_43 | tttcggcaaagaagagaggcttgttcttgacacttcgcttatggccacaaatgcatc   |
| Spacer-PAM-R_44 | tttcggcaaagaagagaggcttgttcttgacacttcgcttatggccacaaatgcatc   |
| Spacer-PAM-R_45 | tttcggcaaagaagagaggcttgttcttgacacttcgcttatggccacaaatgcatc   |
| Spacer-PAM-R_46 | tttcggcaaagaagagaggcttgttcttgacacttcgcttatggccacaaatgcatc   |
| Spacer-PAM-R_48 | tttcggcaaagaagagaggcttgttcttgacacttcgcttatggccacaaatgcatc   |
| Spacer-PAM-R_33 | tttcggcaaagaagagaggcttgttcttgacacttcgtcttatggccacaaatgcatc  |

**Table S2.** Sequences of CRISPR array elements derived from the *Anoxybacillus flavithermus* genome.

| Name             | Structure (5'-3')                    |
|------------------|--------------------------------------|
| CRISPR repeat    | gtaatagttcccctgaggttattgctgtgttatgat |
| CRISPR spacer 1  | aaaatgacacacttatttgataaaaagaaa       |
| CRISPR spacer 2  | ccgaaagtttagactcactataaatcctc        |
| CRISPR spacer 3  | aaaaaggagatcatgaaaaagcagtagct        |
| CRISPR spacer 4  | cgtgggtcaattcggtaaatggaagtttt        |
| CRISPR spacer 5  | tgctacacttttgaccgaaacggagcgga        |
| CRISPR spacer 6  | agaccagtccaactagaaattaattttaga       |
| CRISPR spacer 7  | tgaagaaaaagaaaactgtagagaacaac        |
| CRISPR spacer 8  | tcatcagcaaaaatgtatagcgagaacggc       |
| CRISPR spacer 9  | tttctgtctagcagaacaactatttctgaa       |
| CRISPR spacer 10 | tttgctactatgatagaaagaacattagtg       |
| CRISPR spacer 11 | tttctgtctagcagaacaactatttccgaa       |
| CRISPR spacer 12 | tttctgtctagcagaacaactatttcggcg       |
| CRISPR spacer 13 | cagaaagggttggaaggtgattcgatgaag       |
| CRISPR spacer 14 | ccaaattcatgttttaagaacccgctgata       |
| CRISPR spacer 15 | atcatttaacgtcttactgatccgcgtatt       |
| CRISPR spacer 16 | tggtggtgatatgcctaataacgaattaaa       |

**Table S3.** Structure of dsDNA templates used as a library to determine AnCas9 PAM specificity. The PAM motif is highlighted in green.

| Name          | Structure (5'-3')                                                                                                                               |
|---------------|-------------------------------------------------------------------------------------------------------------------------------------------------|
| Spacer-PAM_1  | CAAGAAGGAGATGTCTGGGGATGTCAGGGATGCATTTGTGGCCAT <b>TGTTCAA</b> AGTG<br>TCAAGAACAAGCCTCTCTTCTTTGCCGACAAACTTTACAAATCCATGAAGGGTGCT<br>GGCACAGATGAGAA |
| Spacer-PAM_2  | CAAGAAGGAGATGTCTGGGGATGTCAGGGATGCATTTGTGGCCAT <b>TGTTCCA</b> AGTG<br>TCAAGAACAAGCCTCTCTTCTTTGCCGACAAACTTTACAAATCCATGAAGGGTGCT<br>GGCACAGATGAGAA |
| Spacer-PAM_3  | CAAGAAGGAGATGTCTGGGGATGTCAGGGATGCATTTGTGGCCAT <b>TGTTCGA</b> AGTG<br>TCAAGAACAAGCCTCTCTTCTTTGCCGACAAACTTTACAAATCCATGAAGGGTGCT<br>GGCACAGATGAGAA |
| Spacer-PAM_4  | CAAGAAGGAGATGTCTGGGGATGTCAGGGATGCATTTGTGGCCAT <b>TGTTCTA</b> AGTG<br>TCAAGAACAAGCCTCTCTTCTTTGCCGACAAACTTTACAAATCCATGAAGGGTGCT<br>GGCACAGATGAGAA |
| Spacer-PAM_5  | CAAGAAGGAGATGTCTGGGGATGTCAGGGATGCATTTGTGGCCAT <b>TGATCAA</b> AGTG<br>TCAAGAACAAGCCTCTCTTCTTTGCCGACAAACTTTACAAATCCATGAAGGGTGCT<br>GGCACAGATGAGAA |
| Spacer-PAM_6  | CAAGAAGGAGATGTCTGGGGATGTCAGGGATGCATTTGTGGCCAT <b>TGATCCA</b> AGTG<br>TCAAGAACAAGCCTCTCTTCTTTGCCGACAAACTTTACAAATCCATGAAGGGTGCT<br>GGCACAGATGAGAA |
| Spacer-PAM_7  | CAAGAAGGAGATGTCTGGGGATGTCAGGGATGCATTTGTGGCCAT <b>TGATCGA</b> AGTG<br>TCAAGAACAAGCCTCTCTTCTTTGCCGACAAACTTTACAAATCCATGAAGGGTGCT<br>GGCACAGATGAGAA |
| Spacer-PAM_8  | CAAGAAGGAGATGTCTGGGGATGTCAGGGATGCATTTGTGGCCAT <b>TGATCTA</b> AGTG<br>TCAAGAACAAGCCTCTCTTCTTTGCCGACAAACTTTACAAATCCATGAAGGGTGCT<br>GGCACAGATGAGAA |
| Spacer-PAM_9  | CAAGAAGGAGATGTCTGGGGATGTCAGGGATGCATTTGTGGCCAT <b>TGCTCAA</b> AGTG<br>TCAAGAACAAGCCTCTCTTCTTTGCCGACAAACTTTACAAATCCATGAAGGGTGCT<br>GGCACAGATGAGAA |
| Spacer-PAM_10 | CAAGAAGGAGATGTCTGGGGATGTCAGGGATGCATTTGTGGCCAT <b>TGCTCCA</b> AGTG<br>TCAAGAACAAGCCTCTCTTCTTTGCCGACAAACTTTACAAATCCATGAAGGGTGCT<br>GGCACAGATGAGAA |
| Spacer-PAM_11 | CAAGAAGGAGATGTCTGGGGATGTCAGGGATGCATTTGTGGCCAT <b>TGCTCGA</b> AGTG<br>TCAAGAACAAGCCTCTCTTCTTTGCCGACAAACTTTACAAATCCATGAAGGGTGCT<br>GGCACAGATGAGAA |
| Spacer-PAM_12 | CAAGAAGGAGATGTCTGGGGATGTCAGGGATGCATTTGTGGCCAT <b>TGCTCTA</b> AGTG<br>TCAAGAACAAGCCTCTCTTCTTTGCCGACAAACTTTACAAATCCATGAAGGGTGCT<br>GGCACAGATGAGAA |
| Spacer-PAM_13 | CAAGAAGGAGATGTCTGGGGATGTCAGGGATGCATTTGTGGCCAT <b>TGGTCAA</b> AGTG<br>TCAAGAACAAGCCTCTCTTCTTTGCCGACAAACTTTACAAATCCATGAAGGGTGCT<br>GGCACAGATGAGAA |
| Spacer-PAM_14 | CAAGAAGGAGATGTCTGGGGATGTCAGGGATGCATTTGTGGCCAT <b>TGGTCCA</b> AGTG<br>TCAAGAACAAGCCTCTCTTCTTTGCCGACAAACTTTACAAATCCATGAAGGGTGCT<br>GGCACAGATGAGAA |
| Spacer-PAM_15 | CAAGAAGGAGATGTCTGGGGATGTCAGGGATGCATTTGTGGCCAT <b>TGGTCGA</b> AGTG<br>TCAAGAACAAGCCTCTCTTCTTTGCCGACAAACTTTACAAATCCATGAAGGGTGCT<br>GGCACAGATGAGAA |
| Spacer-PAM_16 | CAAGAAGGAGATGTCTGGGGATGTCAGGGATGCATTTGTGGCCAT <b>TGGTCTA</b> AGTG<br>TCAAGAACAAGCCTCTCTTCTTTGCCGACAAACTTTACAAATCCATGAAGGGTGCT<br>GGCACAGATGAGAA |
| Spacer-PAM_18 | CAAGAAGGAGATGTCTGGGGATGTCAGGGATGCATTTGTGGCCAT <b>TGGTCGAC</b> GTG<br>TCAAGAACAAGCCTCTCTTCTTTGCCGACAAACTTTACAAATCCATGAAGGGTGCT<br>GGCACAGATGAGAA |

|                 |                                                                                                                                                |
|-----------------|------------------------------------------------------------------------------------------------------------------------------------------------|
| Spacer-PAM_19   | CAAGAAGGAGATGTCTGGGGATGTCAGGGATGCATTTGTGGCCAT <b>TGGTCGAGGTG</b><br>TCAAGAACAAGCCTCTCTTCTTTGCCGACAACTTTACAAATCCATGAAGGGTGCT<br>GGCACAGATGAGAA  |
| Spacer-PAM_20   | CAAGAAGGAGATGTCTGGGGATGTCAGGGATGCATTTGTGGCCAT <b>TGGTCGATGTG</b><br>TCAAGAACAAGCCTCTCTTCTTTGCCGACAACTTTACAAATCCATGAAGGGTGCT<br>GGCACAGATGAGAA  |
| Spacer-PAM_21   | CAAGAAGGAGATGTCTGGGGATGTCAGGGATGCATTTGTGGCCAT <b>AGGTCTGAAGTG</b><br>TCAAGAACAAGCCTCTCTTCTTTGCCGACAACTTTACAAATCCATGAAGGGTGCT<br>GGCACAGATGAGAA |
| Spacer-PAM_22   | CAAGAAGGAGATGTCTGGGGATGTCAGGGATGCATTTGTGGCCAT <b>AGGTCTGACGTG</b><br>TCAAGAACAAGCCTCTCTTCTTTGCCGACAACTTTACAAATCCATGAAGGGTGCT<br>GGCACAGATGAGAA |
| Spacer-PAM_23   | CAAGAAGGAGATGTCTGGGGATGTCAGGGATGCATTTGTGGCCAT <b>AGGTCTGAGGTG</b><br>TCAAGAACAAGCCTCTCTTCTTTGCCGACAACTTTACAAATCCATGAAGGGTGCT<br>GGCACAGATGAGAA |
| Spacer-PAM_24   | CAAGAAGGAGATGTCTGGGGATGTCAGGGATGCATTTGTGGCCAT <b>AGGTCTGATGTG</b><br>TCAAGAACAAGCCTCTCTTCTTTGCCGACAACTTTACAAATCCATGAAGGGTGCT<br>GGCACAGATGAGAA |
| Spacer-PAM_25   | CAAGAAGGAGATGTCTGGGGATGTCAGGGATGCATTTGTGGCCAT <b>CGGTCTGAAGTG</b><br>TCAAGAACAAGCCTCTCTTCTTTGCCGACAACTTTACAAATCCATGAAGGGTGCT<br>GGCACAGATGAGAA |
| Spacer-PAM_26   | CAAGAAGGAGATGTCTGGGGATGTCAGGGATGCATTTGTGGCCAT <b>CGGTCTGACGTG</b><br>TCAAGAACAAGCCTCTCTTCTTTGCCGACAACTTTACAAATCCATGAAGGGTGCT<br>GGCACAGATGAGAA |
| Spacer-PAM_27   | CAAGAAGGAGATGTCTGGGGATGTCAGGGATGCATTTGTGGCCAT <b>CGGTCTGAGGTG</b><br>TCAAGAACAAGCCTCTCTTCTTTGCCGACAACTTTACAAATCCATGAAGGGTGCT<br>GGCACAGATGAGAA |
| Spacer-PAM_28   | CAAGAAGGAGATGTCTGGGGATGTCAGGGATGCATTTGTGGCCAT <b>CGGTCTGATGTG</b><br>TCAAGAACAAGCCTCTCTTCTTTGCCGACAACTTTACAAATCCATGAAGGGTGCT<br>GGCACAGATGAGAA |
| Spacer-PAM_29   | CAAGAAGGAGATGTCTGGGGATGTCAGGGATGCATTTGTGGCCAT <b>GGGTCTGAAGTG</b><br>TCAAGAACAAGCCTCTCTTCTTTGCCGACAACTTTACAAATCCATGAAGGGTGCT<br>GGCACAGATGAGAA |
| Spacer-PAM_30   | CAAGAAGGAGATGTCTGGGGATGTCAGGGATGCATTTGTGGCCAT <b>GGGTCTGACGTG</b><br>TCAAGAACAAGCCTCTCTTCTTTGCCGACAACTTTACAAATCCATGAAGGGTGCT<br>GGCACAGATGAGAA |
| Spacer-PAM_31   | CAAGAAGGAGATGTCTGGGGATGTCAGGGATGCATTTGTGGCCAT <b>GGGTCTGAGGTG</b><br>TCAAGAACAAGCCTCTCTTCTTTGCCGACAACTTTACAAATCCATGAAGGGTGCT<br>GGCACAGATGAGAA |
| Spacer-PAM_32   | CAAGAAGGAGATGTCTGGGGATGTCAGGGATGCATTTGTGGCCAT <b>GGGTCTGATGTG</b><br>TCAAGAACAAGCCTCTCTTCTTTGCCGACAACTTTACAAATCCATGAAGGGTGCT<br>GGCACAGATGAGAA |
| Spacer-PAM-R_33 | CAAGAAGGAGATGTCTGGGGATGTCAGGGATGCATTTGTGGCCAT <b>AAGACGAAGT</b><br>GTCAAGAACAAGCCTCTCTTCTTTGCCGACAACTTTACAAATCCATGAAGGGTGC<br>TGGCACAGATGAGAA  |
| Spacer-PAM-R_34 | CAAGAAGGAGATGTCTGGGGATGTCAGGGATGCATTTGTGGCCAT <b>ACGACGAAGT</b><br>GTCAAGAACAAGCCTCTCTTCTTTGCCGACAACTTTACAAATCCATGAAGGGTGC<br>TGGCACAGATGAGAA  |
| Spacer-PAM-R_35 | CAAGAAGGAGATGTCTGGGGATGTCAGGGATGCATTTGTGGCCAT <b>AGGACGAAGT</b><br>GTCAAGAACAAGCCTCTCTTCTTTGCCGACAACTTTACAAATCCATGAAGGGTGC<br>TGGCACAGATGAGAA  |
| Spacer-PAM-R_36 | CAAGAAGGAGATGTCTGGGGATGTCAGGGATGCATTTGTGGCCAT <b>ATGACGAAGTG</b><br>TCAAGAACAAGCCTCTCTTCTTTGCCGACAACTTTACAAATCCATGAAGGGTGCT<br>GGCACAGATGAGAA  |

---

|                 |                                                                                                                                                 |
|-----------------|-------------------------------------------------------------------------------------------------------------------------------------------------|
| Spacer-PAM-R_37 | CAAGAAGGAGATGTCTGGGGATGTCAGGGATGCATTTGTGGCCAT <b>AAGCCGAA</b> GT<br>GTCAAGAACAAGCCTCTCTTCTTTGCCGACAACTTTACAAATCCATGAAGGGTGCT<br>TGGCACAGATGAGAA |
| Spacer-PAM-R_38 | CAAGAAGGAGATGTCTGGGGATGTCAGGGATGCATTTGTGGCCAT <b>ACGCCGAA</b> GTG<br>TCAAGAACAAGCCTCTCTTCTTTGCCGACAACTTTACAAATCCATGAAGGGTGCT<br>GGCACAGATGAGAA  |
| Spacer-PAM-R_39 | CAAGAAGGAGATGTCTGGGGATGTCAGGGATGCATTTGTGGCCAT <b>AGGCCGAA</b> GT<br>GTCAAGAACAAGCCTCTCTTCTTTGCCGACAACTTTACAAATCCATGAAGGGTGCT<br>TGGCACAGATGAGAA |
| Spacer-PAM-R_40 | CAAGAAGGAGATGTCTGGGGATGTCAGGGATGCATTTGTGGCCAT <b>ATGCCGAA</b> GTG<br>TCAAGAACAAGCCTCTCTTCTTTGCCGACAACTTTACAAATCCATGAAGGGTGCT<br>GGCACAGATGAGAA  |
| Spacer-PAM-R_41 | CAAGAAGGAGATGTCTGGGGATGTCAGGGATGCATTTGTGGCCAT <b>AAGGCCAA</b> GT<br>GTCAAGAACAAGCCTCTCTTCTTTGCCGACAACTTTACAAATCCATGAAGGGTGCT<br>TGGCACAGATGAGAA |
| Spacer-PAM-R_42 | CAAGAAGGAGATGTCTGGGGATGTCAGGGATGCATTTGTGGCCAT <b>ACGGCGAA</b> GT<br>GTCAAGAACAAGCCTCTCTTCTTTGCCGACAACTTTACAAATCCATGAAGGGTGCT<br>TGGCACAGATGAGAA |
| Spacer-PAM-R_43 | CAAGAAGGAGATGTCTGGGGATGTCAGGGATGCATTTGTGGCCAT <b>AGGGCGAA</b> GT<br>GTCAAGAACAAGCCTCTCTTCTTTGCCGACAACTTTACAAATCCATGAAGGGTGCT<br>TGGCACAGATGAGAA |
| Spacer-PAM-R_44 | CAAGAAGGAGATGTCTGGGGATGTCAGGGATGCATTTGTGGCCAT <b>ATGGCGAA</b> GTG<br>TCAAGAACAAGCCTCTCTTCTTTGCCGACAACTTTACAAATCCATGAAGGGTGCT<br>GGCACAGATGAGAA  |
| Spacer-PAM-R_45 | CAAGAAGGAGATGTCTGGGGATGTCAGGGATGCATTTGTGGCCAT <b>AAGTCGAA</b> GTG<br>TCAAGAACAAGCCTCTCTTCTTTGCCGACAACTTTACAAATCCATGAAGGGTGCT<br>GGCACAGATGAGAA  |
| Spacer-PAM-R_46 | CAAGAAGGAGATGTCTGGGGATGTCAGGGATGCATTTGTGGCCAT <b>ACGTCGAA</b> GTG<br>TCAAGAACAAGCCTCTCTTCTTTGCCGACAACTTTACAAATCCATGAAGGGTGCT<br>GGCACAGATGAGAA  |
| Spacer-PAM-R_48 | CAAGAAGGAGATGTCTGGGGATGTCAGGGATGCATTTGTGGCCAT <b>ATGTCGAA</b> GTG<br>TCAAGAACAAGCCTCTCTTCTTTGCCGACAACTTTACAAATCCATGAAGGGTGCT<br>GGCACAGATGAGAA  |

---
