# Supplementary material for: Expression and Functional Analysis of the Compact Thermophilic Anoxybacillus flavithermus Cas9 Nuclease
Source: MDPI journal article supplement (doi:10.3390/ijms242317121), 2023-12-04
Supplement: s1 [file s1]

# Supplementary Materials:

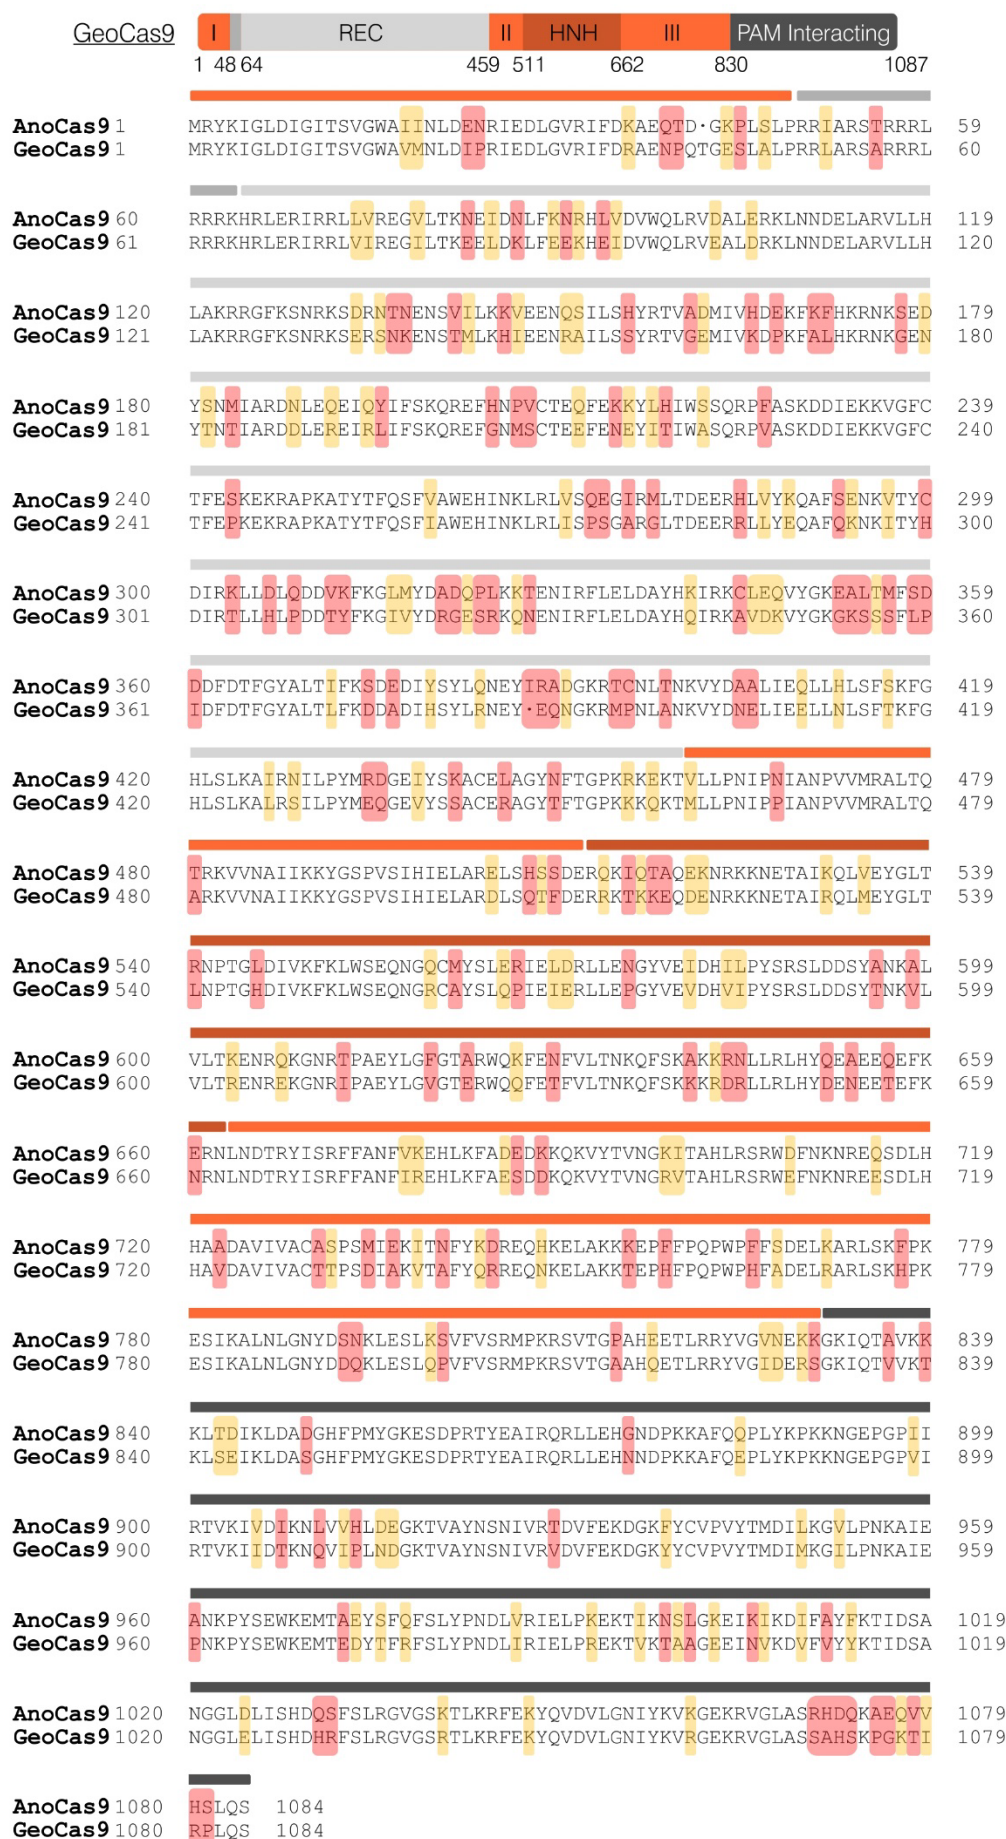

**Figure S1.** Alignment of AnoCas9 and GeoCas9 protein sequences. Mismatches are highlighted in red and conservative substitutions are highlighted in yellow. GeoCas9 domain structure is presented with domains marked with varying colors.

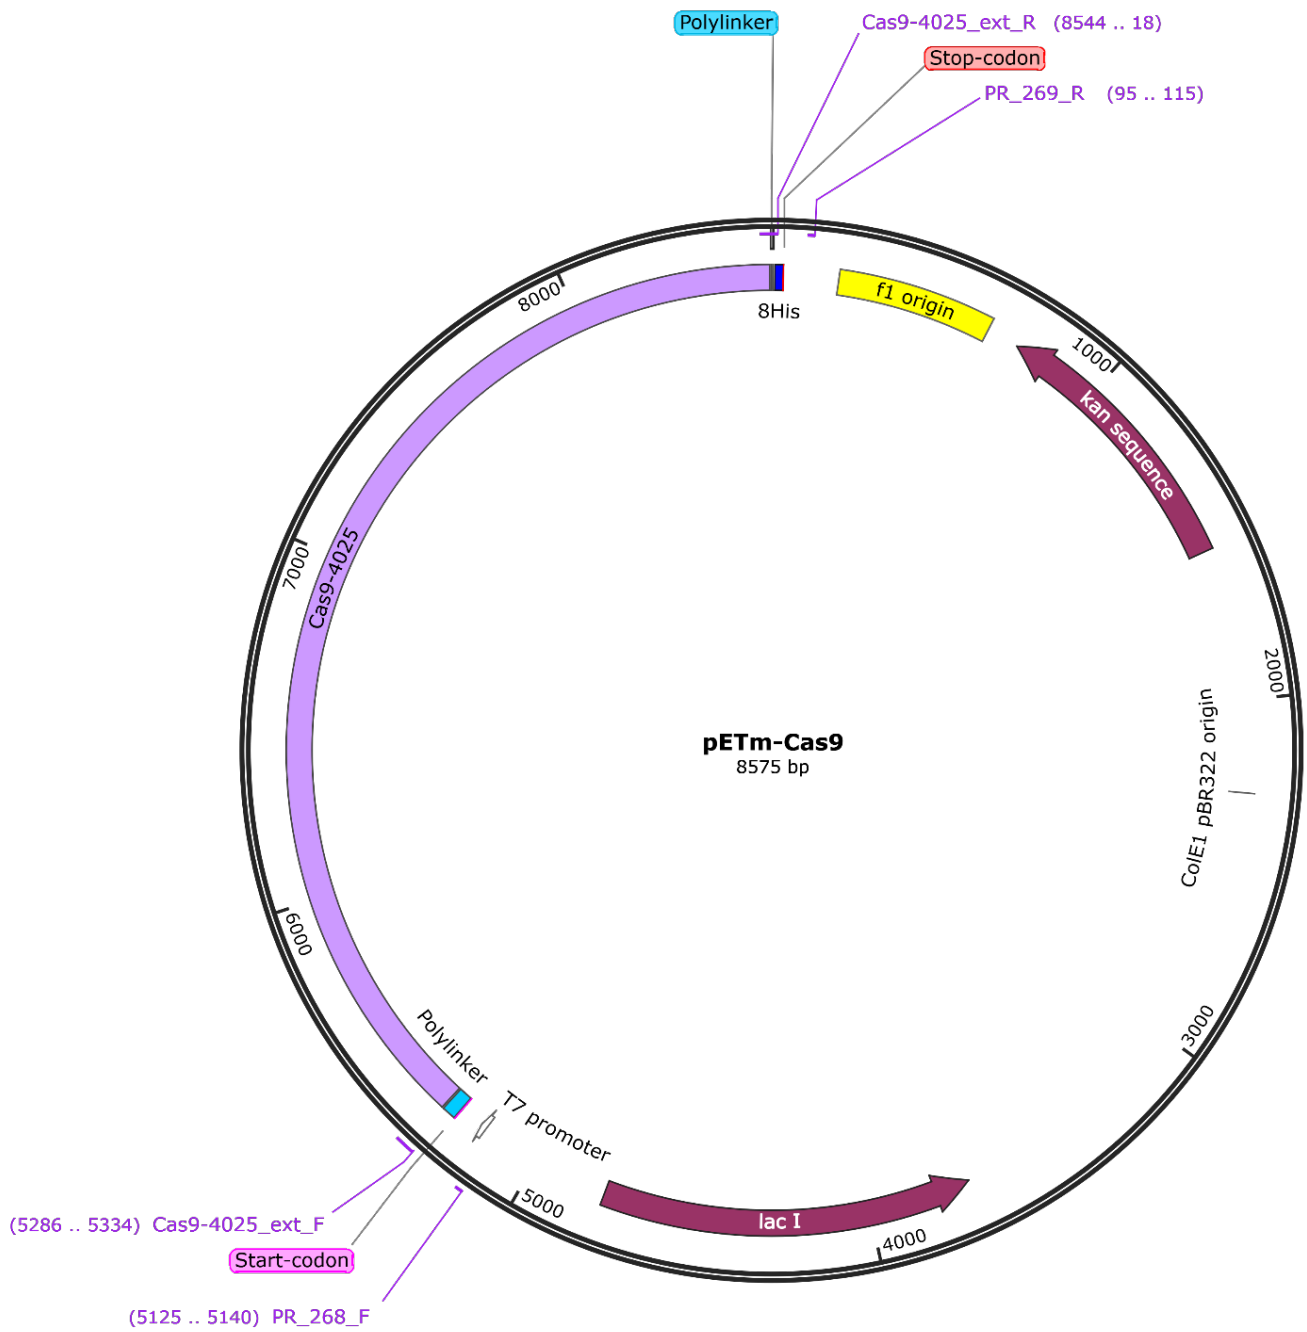

Figure S2. pETm-AnoCas9 map.

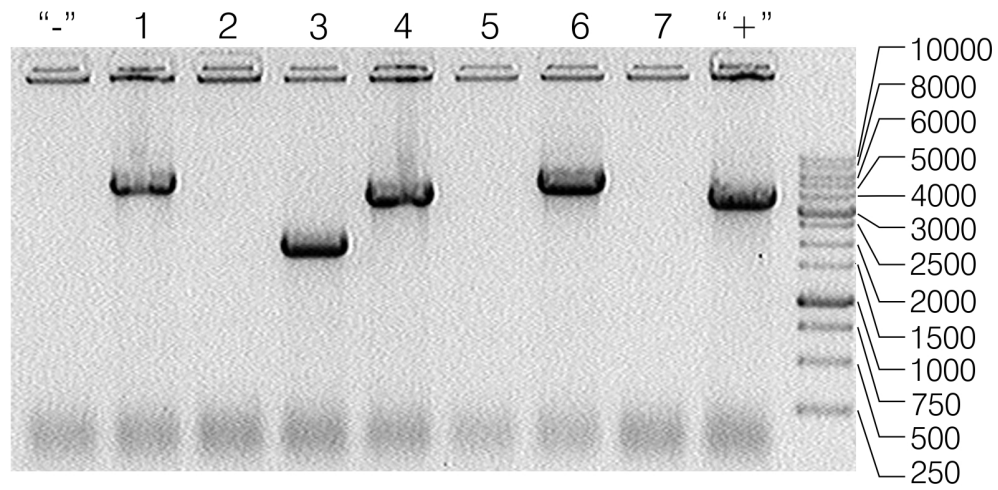

**Figure S3.** Analysis of PCR products after electrophoresis in 1% agarose gel. The expected product length was 3,580 bp in the case of the *anoCas9* insertion. Lane "-" – negative control, lane "+" – positive control (ligation mixture was used as a template). Lanes 1-7 refer to the colonies 1-7, respectively.

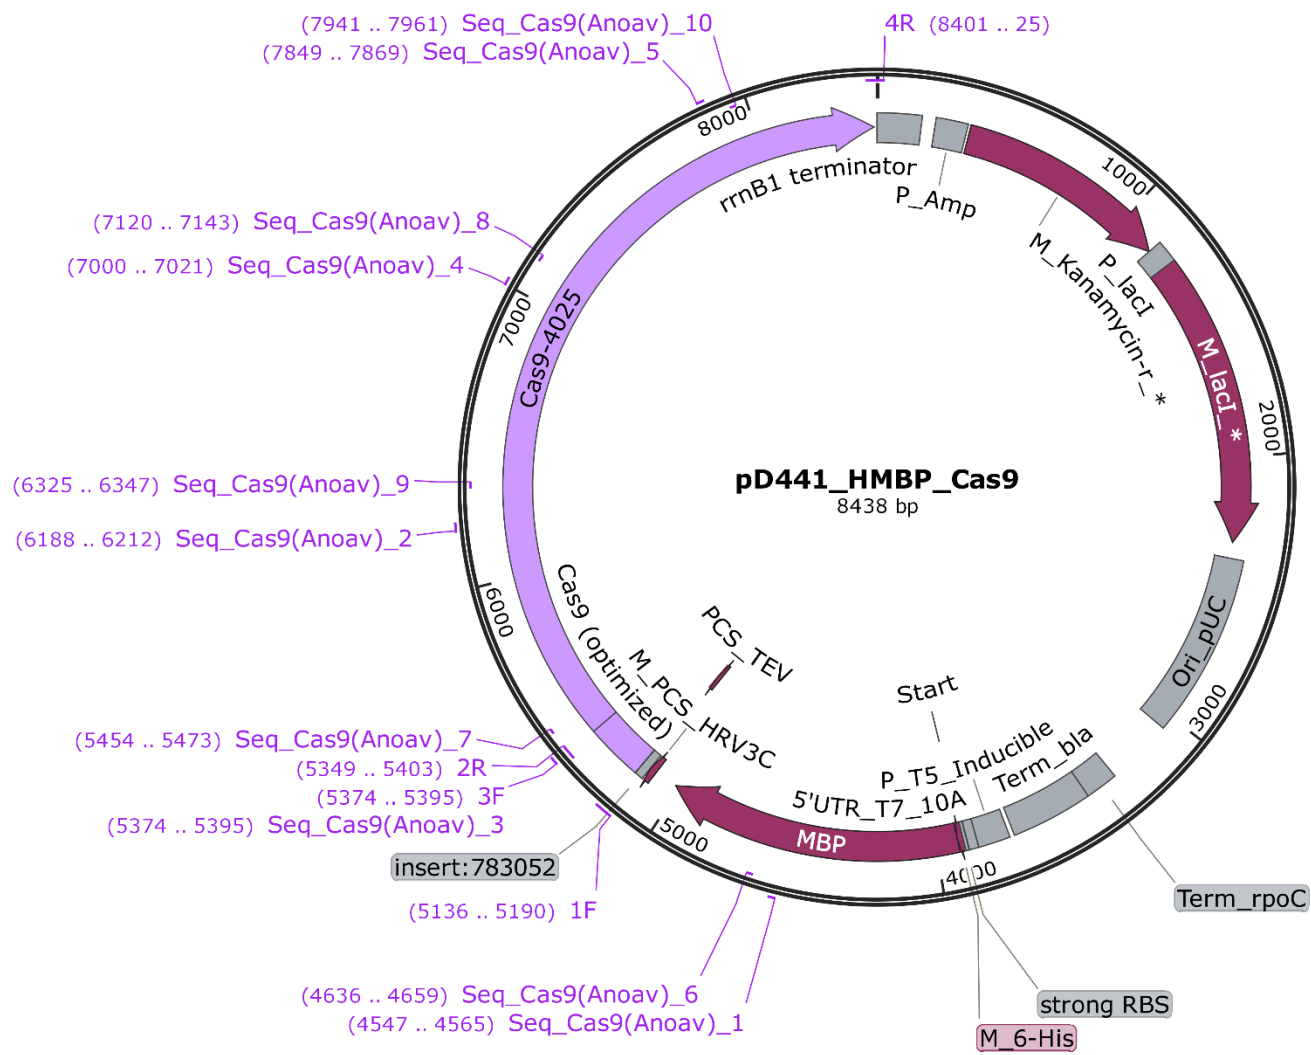

**Figure S4.** pD441-HMBP-AnoCas9 map.

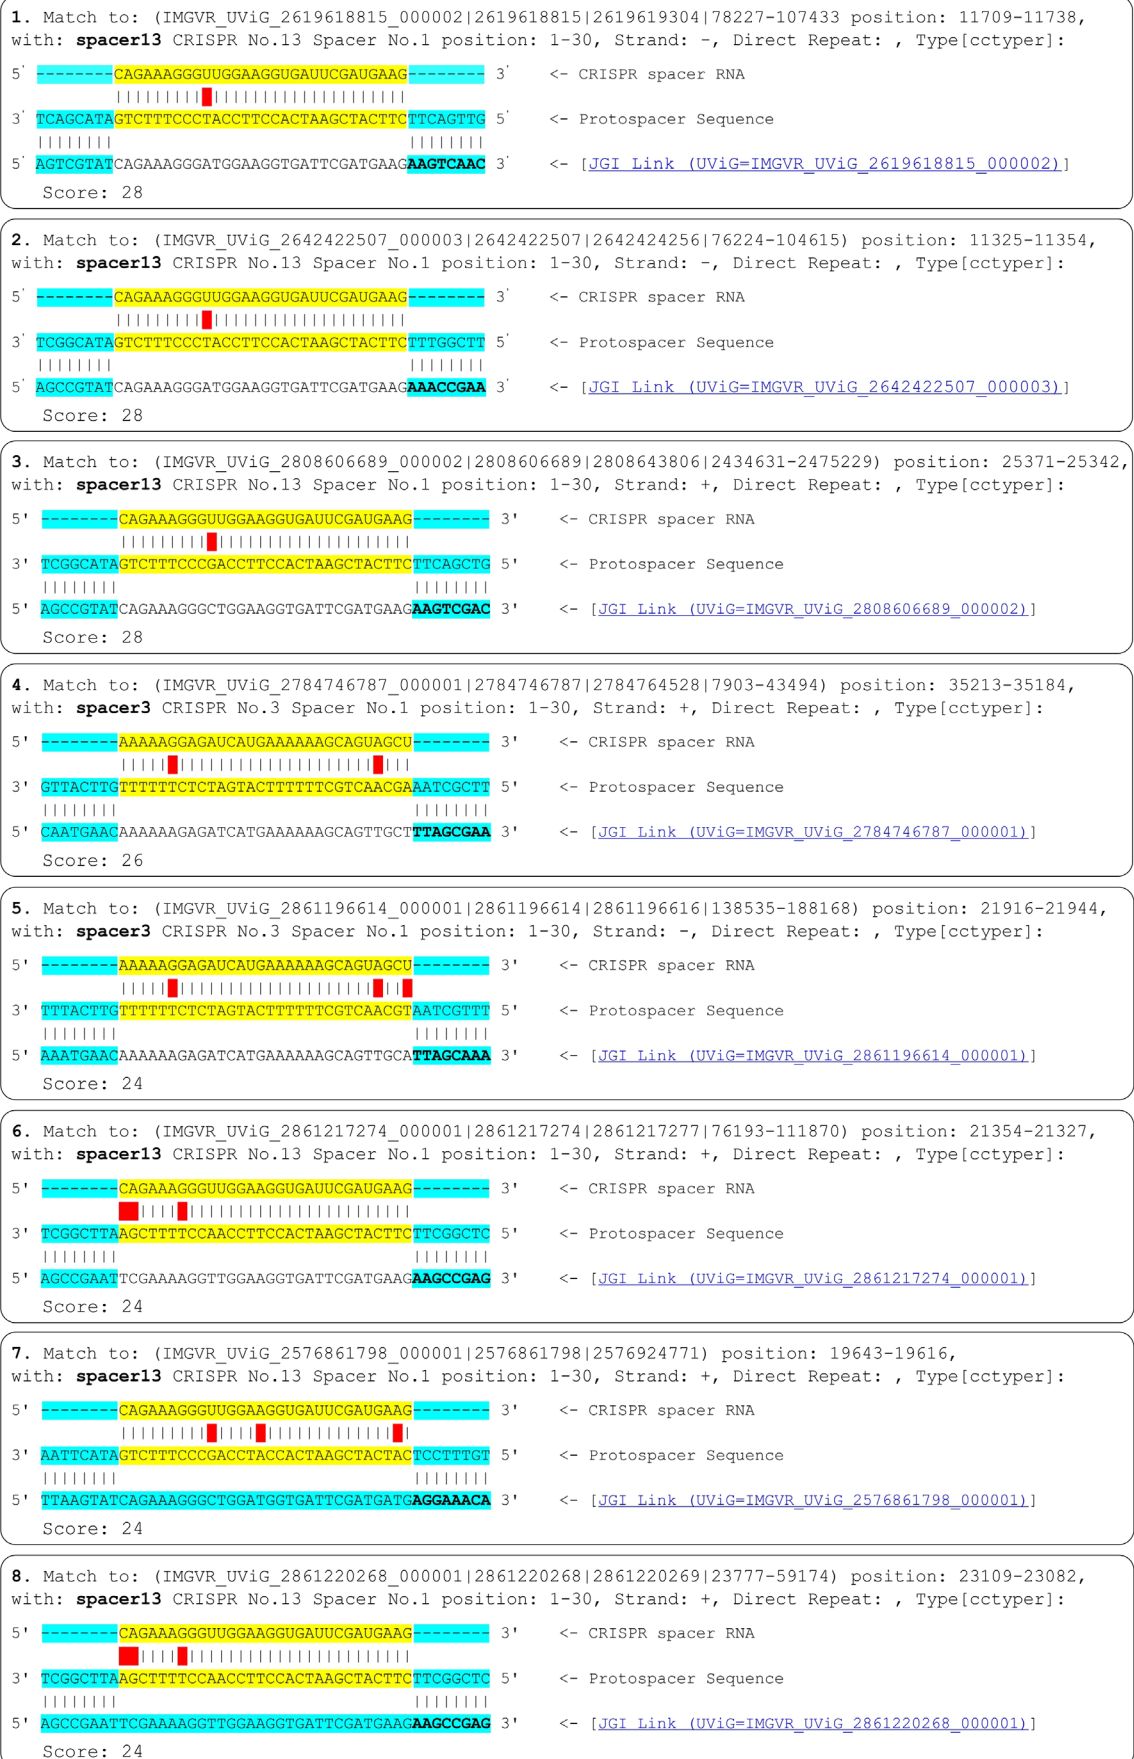

**Figure S5.** CRISPRTarget spacer analysis. First 8 targets are presented that were used to predict and create the PAM sequence logo.



A

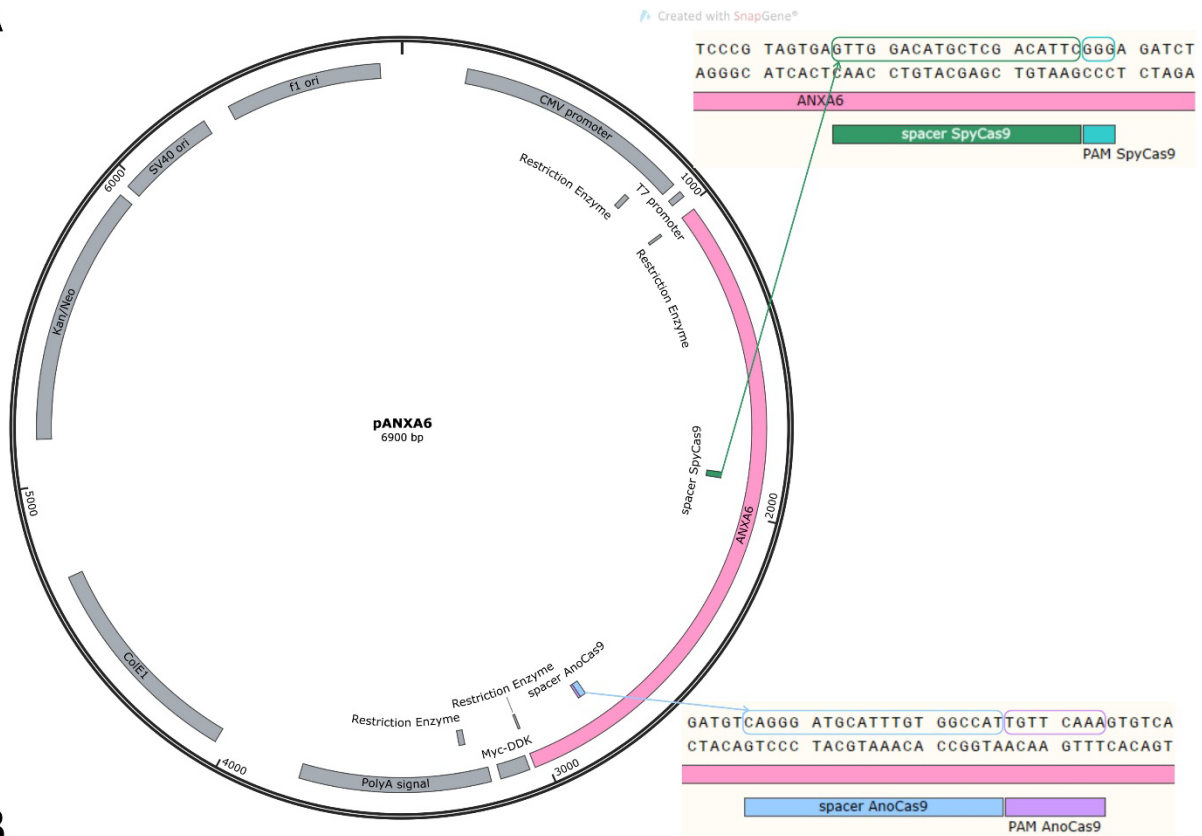

B

repeat 1

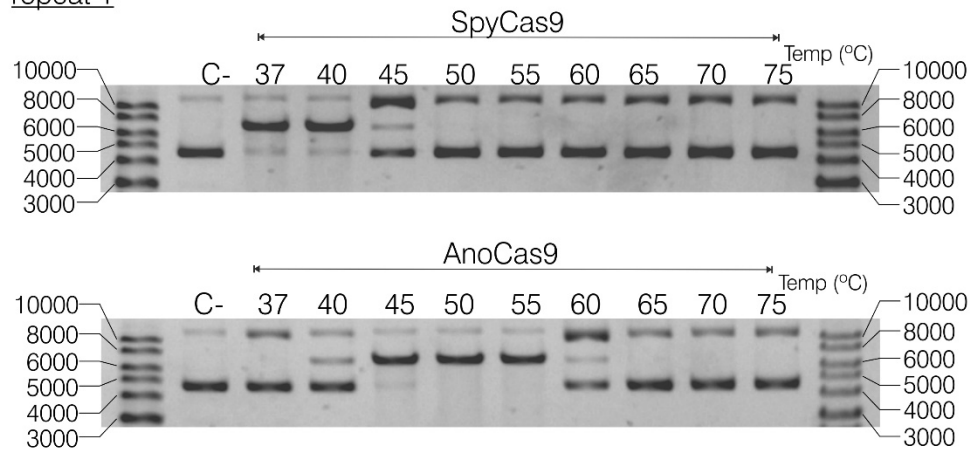

repeat 2

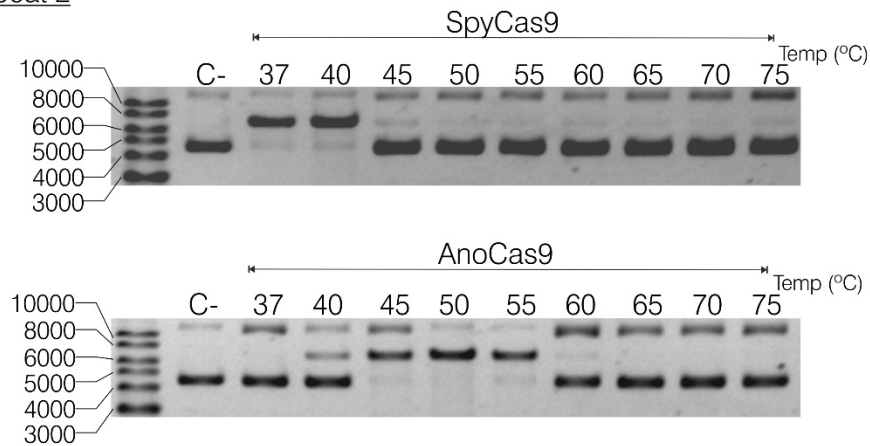

**Figure S6.** Experimental design for the Cas9 cleavage assay. The map of pANXA6 is presented with the spacer and PAM sequences for SpyCas9 and AnoCas9 highlighted (A). Technical replicates of the temperature gradient cleavage assay are presented (B). Reaction mixtures were resolved in the 1% agarose gel after incubation at the indicated temperature and quenching. Plasmid DNA without Cas9 treatment (C-) was used as a negative control.

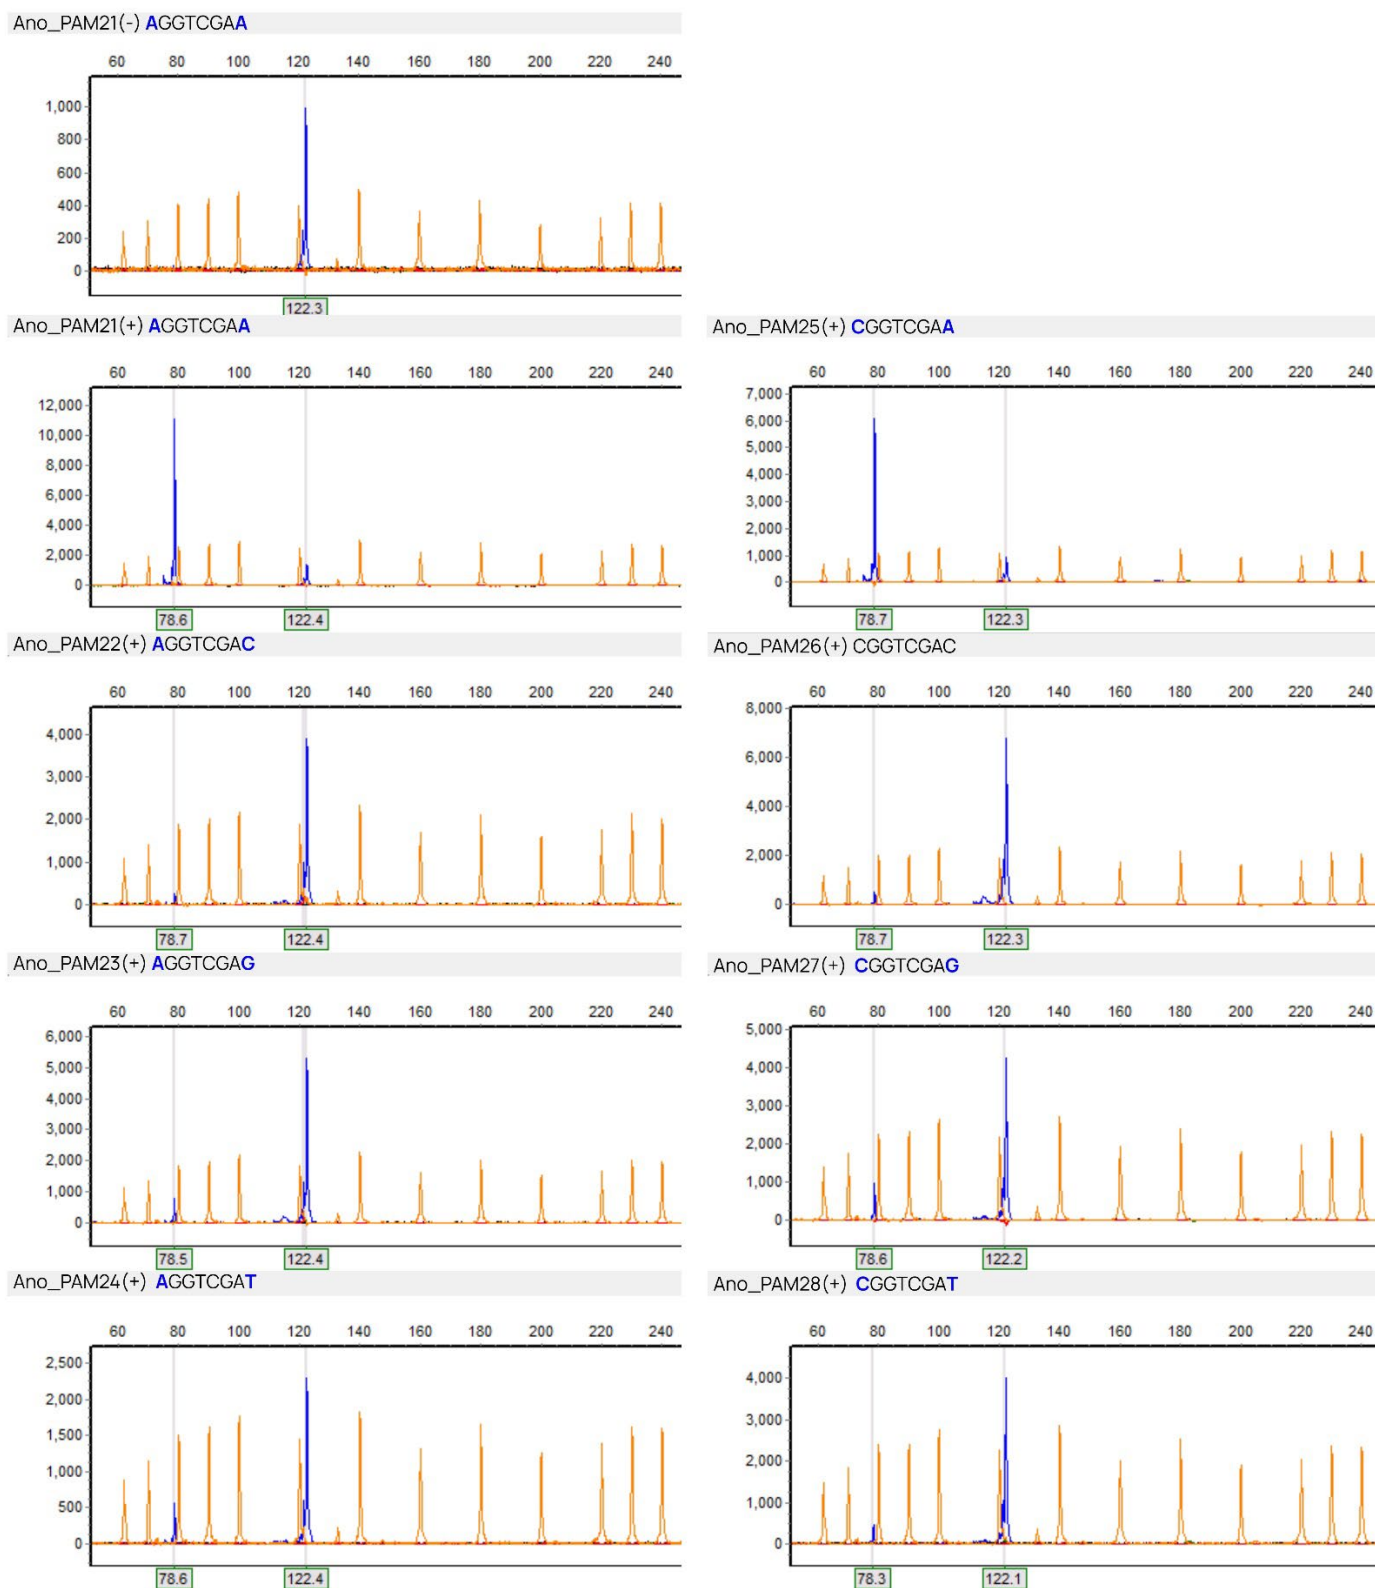

**Figure S7.** A few examples of electropherograms of the AnCas9 digestion for the FAM-labeled PAM-variable DNA substrates. PAM (-) control refers to the sample with no Cas9 nuclease added. Variable PAM nucleotide positions for the displayed subset of substrates are marked in blue. The observed difference in the lengths of uncut and cut fragments compared to the expected ones from the experiment design is related to the overall short length of the substrates tested and seemingly lowered resolution of the gel analyzer in the selected area.

**Table S1.** Amplification primers used for the generation of FAM-labeled dsDNA PAM-templates.

| Name            | Structure (5'-3')                                           |
|-----------------|-------------------------------------------------------------|
| Uni-Spacer-F    | caagaaggagatgtctggggatgtcagggatgcatttgtggccat               |
| FAM-Uni-R       | ttctcatctgtgccagcaccttcatggatttgaagttgtcggcaaagaagaga       |
| Spacer-PAM-R_1  | ttgtcggcaaagaagagaggcttgttcttgacacttgaacaatggccacaaatgcatc  |
| Spacer-PAM-R_2  | ttgtcggcaaagaagagaggcttgttcttgacacttgaacaatggccacaaatgcatc  |
| Spacer-PAM-R_3  | ttgtcggcaaagaagagaggcttgttcttgacacttgaacaatggccacaaatgcatc  |
| Spacer-PAM-R_4  | ttgtcggcaaagaagagaggcttgttcttgacacttagaacaatggccacaaatgcatc |
| Spacer-PAM-R_5  | ttgtcggcaaagaagagaggcttgttcttgacactttgatcaatggccacaaatgcatc |
| Spacer-PAM-R_6  | ttgtcggcaaagaagagaggcttgttcttgacacttggatcaatggccacaaatgcatc |
| Spacer-PAM-R_7  | ttgtcggcaaagaagagaggcttgttcttgacacttcgatcaatggccacaaatgcatc |
| Spacer-PAM-R_8  | ttgtcggcaaagaagagaggcttgttcttgacacttagatcaatggccacaaatgcatc |
| Spacer-PAM-R_9  | ttgtcggcaaagaagagaggcttgttcttgacactttgagcaatggccacaaatgcatc |
| Spacer-PAM-R_10 | ttgtcggcaaagaagagaggcttgttcttgacacttggagcaatggccacaaatgcatc |
| Spacer-PAM-R_11 | ttgtcggcaaagaagagaggcttgttcttgacacttcgagcaatggccacaaatgcatc |
| Spacer-PAM-R_12 | ttgtcggcaaagaagagaggcttgttcttgacacttagagcaatggccacaaatgcatc |
| Spacer-PAM-R_13 | ttgtcggcaaagaagagaggcttgttcttgacactttgaccaatggccacaaatgcatc |
| Spacer-PAM-R_14 | ttgtcggcaaagaagagaggcttgttcttgacacttggaccaatggccacaaatgcatc |
| Spacer-PAM-R_15 | ttgtcggcaaagaagagaggcttgttcttgacacttcgaccaatggccacaaatgcatc |
| Spacer-PAM-R_16 | ttgtcggcaaagaagagaggcttgttcttgacacttagaccaatggccacaaatgcatc |
| Spacer-PAM-R_18 | ttgtcggcaaagaagagaggcttgttcttgacacgtcgaccaatggccacaaatgcatc |
| Spacer-PAM-R_19 | ttgtcggcaaagaagagaggcttgttcttgacacctcgaccaatggccacaaatgcatc |
| Spacer-PAM-R_20 | ttgtcggcaaagaagagaggcttgttcttgacacatcgaccaatggccacaaatgcatc |
| Spacer-PAM-R_21 | ttgtcggcaaagaagagaggcttgttcttgacacttcgacctatggccacaaatgcatc |
| Spacer-PAM-R_22 | ttgtcggcaaagaagagaggcttgttcttgacacgtcgacctatggccacaaatgcatc |
| Spacer-PAM-R_23 | ttgtcggcaaagaagagaggcttgttcttgacacctcgacctatggccacaaatgcatc |
| Spacer-PAM-R_24 | ttgtcggcaaagaagagaggcttgttcttgacacatcgacctatggccacaaatgcatc |
| Spacer-PAM-R_25 | ttgtcggcaaagaagagaggcttgttcttgacacttcgaccgatggccacaaatgcatc |
| Spacer-PAM-R_26 | ttgtcggcaaagaagagaggcttgttcttgacacgtcgaccgatggccacaaatgcatc |
| Spacer-PAM-R_27 | ttgtcggcaaagaagagaggcttgttcttgacacctcgaccgatggccacaaatgcatc |
| Spacer-PAM-R_28 | ttgtcggcaaagaagagaggcttgttcttgacacatcgaccgatggccacaaatgcatc |
| Spacer-PAM-R_29 | ttgtcggcaaagaagagaggcttgttcttgacacttcgacctatggccacaaatgcatc |
| Spacer-PAM-R_30 | ttgtcggcaaagaagagaggcttgttcttgacacgtcgacctatggccacaaatgcatc |
| Spacer-PAM-R_31 | ttgtcggcaaagaagagaggcttgttcttgacacctcgacctatggccacaaatgcatc |
| Spacer-PAM-R_32 | ttgtcggcaaagaagagaggcttgttcttgacacatcgacctatggccacaaatgcatc |
| Spacer-PAM-R_33 | ttgtcggcaaagaagagaggcttgttcttgacacttcgtcttatggccacaaatgcatc |
| Spacer-PAM-R_34 | ttgtcggcaaagaagagaggcttgttcttgacacttcgtcttatggccacaaatgcatc |
| Spacer-PAM-R_35 | ttgtcggcaaagaagagaggcttgttcttgacacttcgtcttatggccacaaatgcatc |
| Spacer-PAM-R_36 | ttgtcggcaaagaagagaggcttgttcttgacacttcgtcttatggccacaaatgcatc |
| Spacer-PAM-R_37 | ttgtcggcaaagaagagaggcttgttcttgacacttcggcttatggccacaaatgcatc |
| Spacer-PAM-R_38 | ttgtcggcaaagaagagaggcttgttcttgacacttcggcttatggccacaaatgcatc |
| Spacer-PAM-R_39 | ttgtcggcaaagaagagaggcttgttcttgacacttcggcttatggccacaaatgcatc |
| Spacer-PAM-R_40 | ttgtcggcaaagaagagaggcttgttcttgacacttcggcttatggccacaaatgcatc |
| Spacer-PAM-R_41 | ttgtcggcaaagaagagaggcttgttcttgacacttcgccttatggccacaaatgcatc |
| Spacer-PAM-R_42 | ttgtcggcaaagaagagaggcttgttcttgacacttcgccttatggccacaaatgcatc |
| Spacer-PAM-R_43 | ttgtcggcaaagaagagaggcttgttcttgacacttcgccttatggccacaaatgcatc |
| Spacer-PAM-R_44 | ttgtcggcaaagaagagaggcttgttcttgacacttcgccttatggccacaaatgcatc |
| Spacer-PAM-R_45 | ttgtcggcaaagaagagaggcttgttcttgacacttcgacttatggccacaaatgcatc |
| Spacer-PAM-R_46 | ttgtcggcaaagaagagaggcttgttcttgacacttcgacttatggccacaaatgcatc |
| Spacer-PAM-R_48 | ttgtcggcaaagaagagaggcttgttcttgacacttcgacatatggccacaaatgcatc |



**Table S2.** Sequences of CRISPR array elements derived from the *Anoxybacillus flavithermus* genome.

| Name             | Structure (5'-3')                   |
|------------------|-------------------------------------|
| CRISPR repeat    | gtaatagttcccctgaggtattgctgtgttatgat |
| CRISPR spacer 1  | aaaatgacacacttatttgataaaaagaaa      |
| CRISPR spacer 2  | ccgaaagtttagactcactataaaatcctc      |
| CRISPR spacer 3  | aaaaaggagatcatgaaaaagcagtagct       |
| CRISPR spacer 4  | cgtgggtcaattcggtaaatggaagtttt       |
| CRISPR spacer 5  | tgctacacttttgaccgaaacggagcgga       |
| CRISPR spacer 6  | agaccagtccaactagaaattaattttaga      |
| CRISPR spacer 7  | tgaagaaaaagaaaactgtagagaacaac       |
| CRISPR spacer 8  | tcatcagcaaaaatgtatagcgagaacggc      |
| CRISPR spacer 9  | tttctgtctagcagaacaactatttctgaa      |
| CRISPR spacer 10 | tttgctactatgatagaagaacattagtg       |
| CRISPR spacer 11 | tttctgtctagcagaacaactatttccgaa      |
| CRISPR spacer 12 | tttctgtctagcagaacaactatttcggcg      |
| CRISPR spacer 13 | cagaaagggttggaaggtgattcgatgaag      |
| CRISPR spacer 14 | ccaaattcatgtttaagaacccgctgata       |
| CRISPR spacer 15 | atcatttaacgtcttactgatccgcgtatt      |
| CRISPR spacer 16 | tgggtggtgatatgcctaataacgaattaaa     |

**Table S3.** Structure of dsDNA templates used as a library to determine AnCas9 PAM specificity. The PAM motif is highlighted in green.

| Name          | Structure (5'-3')                                                                                                                              |
|---------------|------------------------------------------------------------------------------------------------------------------------------------------------|
| Spacer-PAM_1  | CAAGAAGGAGATGTCTGGGGATGTCAGGGATGCATTTGTGGCCAT <b>TGTTCAAAGTG</b><br>TCAAGAACAAGCCTCTCTTCTTTGCCGACAAACTTTACAAATCCATGAAGGGTGCT<br>GGCACAGATGAGAA |
| Spacer-PAM_2  | CAAGAAGGAGATGTCTGGGGATGTCAGGGATGCATTTGTGGCCAT <b>TGTTCCAAGTG</b><br>TCAAGAACAAGCCTCTCTTCTTTGCCGACAAACTTTACAAATCCATGAAGGGTGCT<br>GGCACAGATGAGAA |
| Spacer-PAM_3  | CAAGAAGGAGATGTCTGGGGATGTCAGGGATGCATTTGTGGCCAT <b>TGTTCGAAGTG</b><br>TCAAGAACAAGCCTCTCTTCTTTGCCGACAAACTTTACAAATCCATGAAGGGTGCT<br>GGCACAGATGAGAA |
| Spacer-PAM_4  | CAAGAAGGAGATGTCTGGGGATGTCAGGGATGCATTTGTGGCCAT <b>TGTTCTAAGTG</b><br>TCAAGAACAAGCCTCTCTTCTTTGCCGACAAACTTTACAAATCCATGAAGGGTGCT<br>GGCACAGATGAGAA |
| Spacer-PAM_5  | CAAGAAGGAGATGTCTGGGGATGTCAGGGATGCATTTGTGGCCAT <b>TGATCAAAGTG</b><br>TCAAGAACAAGCCTCTCTTCTTTGCCGACAAACTTTACAAATCCATGAAGGGTGCT<br>GGCACAGATGAGAA |
| Spacer-PAM_6  | CAAGAAGGAGATGTCTGGGGATGTCAGGGATGCATTTGTGGCCAT <b>TGATCCAAGTG</b><br>TCAAGAACAAGCCTCTCTTCTTTGCCGACAAACTTTACAAATCCATGAAGGGTGCT<br>GGCACAGATGAGAA |
| Spacer-PAM_7  | CAAGAAGGAGATGTCTGGGGATGTCAGGGATGCATTTGTGGCCAT <b>TGATCGAAGTG</b><br>TCAAGAACAAGCCTCTCTTCTTTGCCGACAAACTTTACAAATCCATGAAGGGTGCT<br>GGCACAGATGAGAA |
| Spacer-PAM_8  | CAAGAAGGAGATGTCTGGGGATGTCAGGGATGCATTTGTGGCCAT <b>TGATCTAAGTG</b><br>TCAAGAACAAGCCTCTCTTCTTTGCCGACAAACTTTACAAATCCATGAAGGGTGCT<br>GGCACAGATGAGAA |
| Spacer-PAM_9  | CAAGAAGGAGATGTCTGGGGATGTCAGGGATGCATTTGTGGCCAT <b>TGCTCAAAGTG</b><br>TCAAGAACAAGCCTCTCTTCTTTGCCGACAAACTTTACAAATCCATGAAGGGTGCT<br>GGCACAGATGAGAA |
| Spacer-PAM_10 | CAAGAAGGAGATGTCTGGGGATGTCAGGGATGCATTTGTGGCCAT <b>TGCTCCAAGTG</b><br>TCAAGAACAAGCCTCTCTTCTTTGCCGACAAACTTTACAAATCCATGAAGGGTGCT<br>GGCACAGATGAGAA |
| Spacer-PAM_11 | CAAGAAGGAGATGTCTGGGGATGTCAGGGATGCATTTGTGGCCAT <b>TGCTCGAAGTG</b><br>TCAAGAACAAGCCTCTCTTCTTTGCCGACAAACTTTACAAATCCATGAAGGGTGCT<br>GGCACAGATGAGAA |
| Spacer-PAM_12 | CAAGAAGGAGATGTCTGGGGATGTCAGGGATGCATTTGTGGCCAT <b>TGCTCTAAGTG</b><br>TCAAGAACAAGCCTCTCTTCTTTGCCGACAAACTTTACAAATCCATGAAGGGTGCT<br>GGCACAGATGAGAA |
| Spacer-PAM_13 | CAAGAAGGAGATGTCTGGGGATGTCAGGGATGCATTTGTGGCCAT <b>TGGTCAAAGTG</b><br>TCAAGAACAAGCCTCTCTTCTTTGCCGACAAACTTTACAAATCCATGAAGGGTGCT<br>GGCACAGATGAGAA |
| Spacer-PAM_14 | CAAGAAGGAGATGTCTGGGGATGTCAGGGATGCATTTGTGGCCAT <b>TGGTCCAAGTG</b><br>TCAAGAACAAGCCTCTCTTCTTTGCCGACAAACTTTACAAATCCATGAAGGGTGCT<br>GGCACAGATGAGAA |
| Spacer-PAM_15 | CAAGAAGGAGATGTCTGGGGATGTCAGGGATGCATTTGTGGCCAT <b>TGGTCGAAGTG</b><br>TCAAGAACAAGCCTCTCTTCTTTGCCGACAAACTTTACAAATCCATGAAGGGTGCT<br>GGCACAGATGAGAA |
| Spacer-PAM_16 | CAAGAAGGAGATGTCTGGGGATGTCAGGGATGCATTTGTGGCCAT <b>TGGTCTAAGTG</b><br>TCAAGAACAAGCCTCTCTTCTTTGCCGACAAACTTTACAAATCCATGAAGGGTGCT<br>GGCACAGATGAGAA |
| Spacer-PAM_18 | CAAGAAGGAGATGTCTGGGGATGTCAGGGATGCATTTGTGGCCAT <b>TGGTCGACGTG</b><br>TCAAGAACAAGCCTCTCTTCTTTGCCGACAAACTTTACAAATCCATGAAGGGTGCT<br>GGCACAGATGAGAA |

|                 |                                                                                                                                                 |
|-----------------|-------------------------------------------------------------------------------------------------------------------------------------------------|
| Spacer-PAM_19   | CAAGAAGGAGATGTCTGGGGATGTCAGGGATGCATTTGTGGCCAT <b>TGGTCGAGGTG</b><br>TCAAGAACAAGCCTCTCTTCTTTGCCGACAACTTTACAAATCCATGAAGGGTGCT<br>GGCACAGATGAGAA   |
| Spacer-PAM_20   | CAAGAAGGAGATGTCTGGGGATGTCAGGGATGCATTTGTGGCCAT <b>TGGTCGATGTG</b><br>TCAAGAACAAGCCTCTCTTCTTTGCCGACAACTTTACAAATCCATGAAGGGTGCT<br>GGCACAGATGAGAA   |
| Spacer-PAM_21   | CAAGAAGGAGATGTCTGGGGATGTCAGGGATGCATTTGTGGCCAT <b>AGGTCGAAAGTG</b><br>TCAAGAACAAGCCTCTCTTCTTTGCCGACAACTTTACAAATCCATGAAGGGTGCT<br>GGCACAGATGAGAA  |
| Spacer-PAM_22   | CAAGAAGGAGATGTCTGGGGATGTCAGGGATGCATTTGTGGCCAT <b>AGGTCGACGTG</b><br>TCAAGAACAAGCCTCTCTTCTTTGCCGACAACTTTACAAATCCATGAAGGGTGCT<br>GGCACAGATGAGAA   |
| Spacer-PAM_23   | CAAGAAGGAGATGTCTGGGGATGTCAGGGATGCATTTGTGGCCAT <b>AGGTCGAGGTG</b><br>TCAAGAACAAGCCTCTCTTCTTTGCCGACAACTTTACAAATCCATGAAGGGTGCT<br>GGCACAGATGAGAA   |
| Spacer-PAM_24   | CAAGAAGGAGATGTCTGGGGATGTCAGGGATGCATTTGTGGCCAT <b>AGGTCGATGTG</b><br>TCAAGAACAAGCCTCTCTTCTTTGCCGACAACTTTACAAATCCATGAAGGGTGCT<br>GGCACAGATGAGAA   |
| Spacer-PAM_25   | CAAGAAGGAGATGTCTGGGGATGTCAGGGATGCATTTGTGGCCAT <b>CGGTCTGAAAGTG</b><br>TCAAGAACAAGCCTCTCTTCTTTGCCGACAACTTTACAAATCCATGAAGGGTGCT<br>GGCACAGATGAGAA |
| Spacer-PAM_26   | CAAGAAGGAGATGTCTGGGGATGTCAGGGATGCATTTGTGGCCAT <b>CGGTCTGACGTG</b><br>TCAAGAACAAGCCTCTCTTCTTTGCCGACAACTTTACAAATCCATGAAGGGTGCT<br>GGCACAGATGAGAA  |
| Spacer-PAM_27   | CAAGAAGGAGATGTCTGGGGATGTCAGGGATGCATTTGTGGCCAT <b>CGGTCTGAGGTG</b><br>TCAAGAACAAGCCTCTCTTCTTTGCCGACAACTTTACAAATCCATGAAGGGTGCT<br>GGCACAGATGAGAA  |
| Spacer-PAM_28   | CAAGAAGGAGATGTCTGGGGATGTCAGGGATGCATTTGTGGCCAT <b>CGGTCTGATGTG</b><br>TCAAGAACAAGCCTCTCTTCTTTGCCGACAACTTTACAAATCCATGAAGGGTGCT<br>GGCACAGATGAGAA  |
| Spacer-PAM_29   | CAAGAAGGAGATGTCTGGGGATGTCAGGGATGCATTTGTGGCCAT <b>GGGTCTGAAAGTG</b><br>TCAAGAACAAGCCTCTCTTCTTTGCCGACAACTTTACAAATCCATGAAGGGTGCT<br>GGCACAGATGAGAA |
| Spacer-PAM_30   | CAAGAAGGAGATGTCTGGGGATGTCAGGGATGCATTTGTGGCCAT <b>GGGTCTGACGTG</b><br>TCAAGAACAAGCCTCTCTTCTTTGCCGACAACTTTACAAATCCATGAAGGGTGCT<br>GGCACAGATGAGAA  |
| Spacer-PAM_31   | CAAGAAGGAGATGTCTGGGGATGTCAGGGATGCATTTGTGGCCAT <b>GGGTCTGAGGTG</b><br>TCAAGAACAAGCCTCTCTTCTTTGCCGACAACTTTACAAATCCATGAAGGGTGCT<br>GGCACAGATGAGAA  |
| Spacer-PAM_32   | CAAGAAGGAGATGTCTGGGGATGTCAGGGATGCATTTGTGGCCAT <b>GGGTCTGATGTG</b><br>TCAAGAACAAGCCTCTCTTCTTTGCCGACAACTTTACAAATCCATGAAGGGTGCT<br>GGCACAGATGAGAA  |
| Spacer-PAM-R_33 | CAAGAAGGAGATGTCTGGGGATGTCAGGGATGCATTTGTGGCCAT <b>AAGACGAAAGT</b><br>GTCAAGAACAAGCCTCTCTTCTTTGCCGACAACTTTACAAATCCATGAAGGGTGC<br>TGGCACAGATGAGAA  |
| Spacer-PAM-R_34 | CAAGAAGGAGATGTCTGGGGATGTCAGGGATGCATTTGTGGCCAT <b>ACGACGAAAGT</b><br>GTCAAGAACAAGCCTCTCTTCTTTGCCGACAACTTTACAAATCCATGAAGGGTGC<br>TGGCACAGATGAGAA  |
| Spacer-PAM-R_35 | CAAGAAGGAGATGTCTGGGGATGTCAGGGATGCATTTGTGGCCAT <b>AGGACGAAAGT</b><br>GTCAAGAACAAGCCTCTCTTCTTTGCCGACAACTTTACAAATCCATGAAGGGTGC<br>TGGCACAGATGAGAA  |
| Spacer-PAM-R_36 | CAAGAAGGAGATGTCTGGGGATGTCAGGGATGCATTTGTGGCCAT <b>ATGACGAAAGTG</b><br>TCAAGAACAAGCCTCTCTTCTTTGCCGACAACTTTACAAATCCATGAAGGGTGCT<br>GGCACAGATGAGAA  |

---

|                 |                                                                                                                                                 |
|-----------------|-------------------------------------------------------------------------------------------------------------------------------------------------|
| Spacer-PAM-R_37 | CAAGAAGGAGATGTCTGGGGATGTCAGGGATGCATTTGTGGCCAT <b>AAGCCGAA</b> GT<br>GTCAAGAACAAGCCTCTCTTCTTTGCCGACAACTTTACAAATCCATGAAGGGTGCT<br>TGGCACAGATGAGAA |
| Spacer-PAM-R_38 | CAAGAAGGAGATGTCTGGGGATGTCAGGGATGCATTTGTGGCCAT <b>ACGCCGAA</b> GTG<br>TCAAGAACAAGCCTCTCTTCTTTGCCGACAACTTTACAAATCCATGAAGGGTGCT<br>GGCACAGATGAGAA  |
| Spacer-PAM-R_39 | CAAGAAGGAGATGTCTGGGGATGTCAGGGATGCATTTGTGGCCAT <b>AGGCCGAA</b> GT<br>GTCAAGAACAAGCCTCTCTTCTTTGCCGACAACTTTACAAATCCATGAAGGGTGCT<br>TGGCACAGATGAGAA |
| Spacer-PAM-R_40 | CAAGAAGGAGATGTCTGGGGATGTCAGGGATGCATTTGTGGCCAT <b>ATGCCGAA</b> GTG<br>TCAAGAACAAGCCTCTCTTCTTTGCCGACAACTTTACAAATCCATGAAGGGTGCT<br>GGCACAGATGAGAA  |
| Spacer-PAM-R_41 | CAAGAAGGAGATGTCTGGGGATGTCAGGGATGCATTTGTGGCCAT <b>AAGGCCAA</b> GT<br>GTCAAGAACAAGCCTCTCTTCTTTGCCGACAACTTTACAAATCCATGAAGGGTGCT<br>TGGCACAGATGAGAA |
| Spacer-PAM-R_42 | CAAGAAGGAGATGTCTGGGGATGTCAGGGATGCATTTGTGGCCAT <b>ACGGCGAA</b> GT<br>GTCAAGAACAAGCCTCTCTTCTTTGCCGACAACTTTACAAATCCATGAAGGGTGCT<br>TGGCACAGATGAGAA |
| Spacer-PAM-R_43 | CAAGAAGGAGATGTCTGGGGATGTCAGGGATGCATTTGTGGCCAT <b>AGGGCGAA</b> GT<br>GTCAAGAACAAGCCTCTCTTCTTTGCCGACAACTTTACAAATCCATGAAGGGTGCT<br>TGGCACAGATGAGAA |
| Spacer-PAM-R_44 | CAAGAAGGAGATGTCTGGGGATGTCAGGGATGCATTTGTGGCCAT <b>ATGGCGAA</b> GTG<br>TCAAGAACAAGCCTCTCTTCTTTGCCGACAACTTTACAAATCCATGAAGGGTGCT<br>GGCACAGATGAGAA  |
| Spacer-PAM-R_45 | CAAGAAGGAGATGTCTGGGGATGTCAGGGATGCATTTGTGGCCAT <b>AAGTCGAA</b> GTG<br>TCAAGAACAAGCCTCTCTTCTTTGCCGACAACTTTACAAATCCATGAAGGGTGCT<br>GGCACAGATGAGAA  |
| Spacer-PAM-R_46 | CAAGAAGGAGATGTCTGGGGATGTCAGGGATGCATTTGTGGCCAT <b>ACGTCGAA</b> GTG<br>TCAAGAACAAGCCTCTCTTCTTTGCCGACAACTTTACAAATCCATGAAGGGTGCT<br>GGCACAGATGAGAA  |
| Spacer-PAM-R_48 | CAAGAAGGAGATGTCTGGGGATGTCAGGGATGCATTTGTGGCCAT <b>ATGTCGAA</b> GTG<br>TCAAGAACAAGCCTCTCTTCTTTGCCGACAACTTTACAAATCCATGAAGGGTGCT<br>GGCACAGATGAGAA  |

---
